# Supplementary material
Source: PubMed Central journal article supplement (PMC4118700)
Supplement: Supp_Figure1.pdf [file Supp_Figure1.pdf]

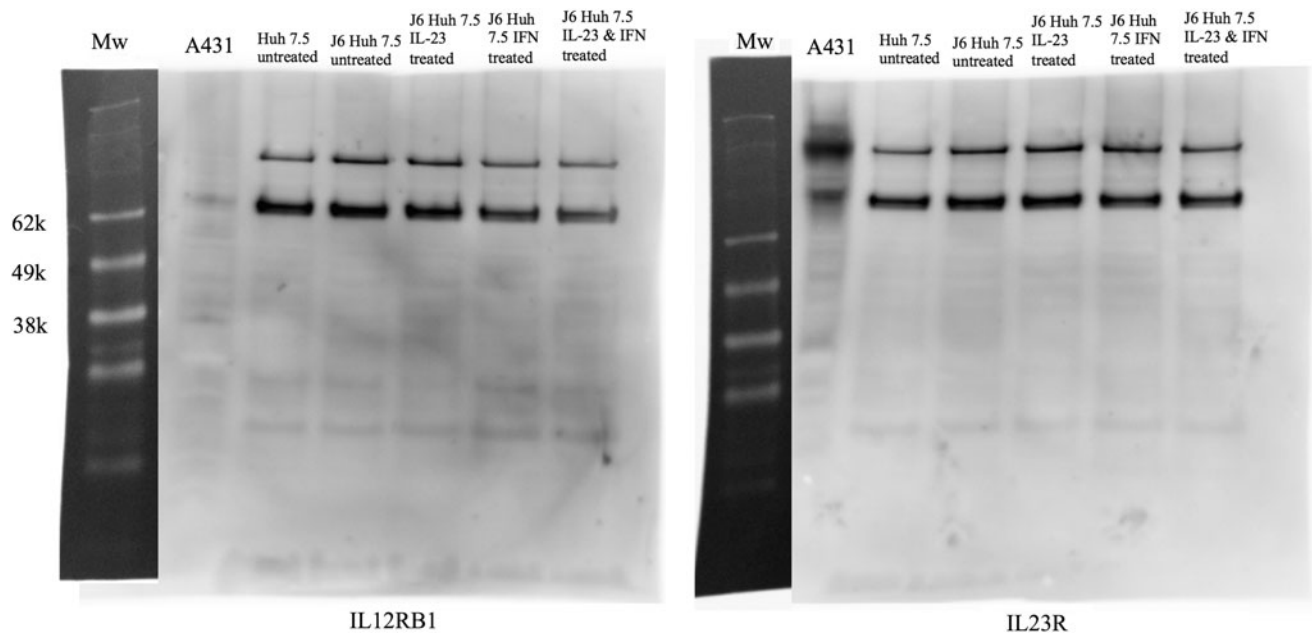

**SUPPLEMENTARY FIG. S1.** Huh7.5 cells express the IL-23 receptor. Huh7.5 cells were lysed and a western blot analysis for the IL-23 receptor was performed as described in Materials and Methods. Huh7.5 cells expressed both the IL-12RB1 and IL-23R components of the IL-23 receptor. The expected product size for IL-12RB1 is 73 kDa and for IL-23R is 75 kDa. Mw, molecular marker; A431 human epithelial carcinoma whole cell lysate positive control.
