# Supplementary material
Source: PubMed Central journal article supplement (PMC4118700)
Supplement: Supp_Table1.pdf [file Supp_Table1.pdf]

## Supplementary Data

SUPPLEMENTARY TABLE S1. PATIENT CHARACTERISTICS

| <i>Characteristic</i>                       | <i>NR</i><br>(n=21) | <i>SVR</i><br>(n=21) | <i>p</i><br><i>value</i> |
|---------------------------------------------|---------------------|----------------------|--------------------------|
| Age                                         | 46 ± 8              | 45 ± 6               | >0.05                    |
| Male gender                                 | 17 (81)             | 20 (95)              | >0.05                    |
| Black                                       | 16 (76)             | 8 (43)               | >0.05                    |
| CD4 <sup>+</sup> T<br>cells/cm <sup>3</sup> | 518 ± 303/26 ± 9    | 564 ± 296/30 ± 9     | >0.05                    |
| HIV VL (log)<br>copies/ml                   | 2.01 ± 0.6          | 2.26 ± 0.9           | >0.05                    |
| HCV VL<br>(log) IU/ml                       | 6.29 ± 0.4          | 5.64 ± 1.0           | >0.05                    |
| HCV genotype 1                              | 19 (90)             | 16 (76)              | >0.05                    |

Descriptive statistics are mean (SD) OR number (%).

Forty-two hepatitis C virus (HCV)/HIV-coinfected patients with known treatment outcomes after standard PEG-interferon (IFN)- $\alpha$ /ribavirin (RBV) therapy were included in this study.

NR, nonresponders; SD, standard deviation; SVR, sustained virologic response; VL, viral load.
